# Supplementary material for: Acid Catalyzed Amination of 4-Chloropyrrolopyrimidine: Effect of Solvent, Acid Amount and Substrate Scope for Reactions in Water
Source: Preprints.org preprint supplement (doi:10.20944/preprints202310.0837.v1), 2023-10-12
Supplement: Supplementary file 1 [file supplementary]

**Supporting Information File**

**Acid catalysed amination of 4-chloropyrrolopyrimidine: effect of solvent, acid amount and substrate scope for reactions in water**

Hanne Svergja, Shuhei Yasuda, Cecilie E. Olsen and Bård Helge Hoff*

Contents

[1. Reference to pKa values 2](#_Toc146525007)

[2. NMR spectra of new compounds 3](#_Toc146525008)

[3. References 15](#_Toc146525009)

# Reference to pKa values

**Table S1.** Experimental, calculated ad estimated pKa values for anilines/anilinium ions.

|  |  |  |  |  |
| --- | --- | --- | --- | --- |
| **Entry** | **Aniline** | **pKa** | **Experimental**  **value** | **Calculated/other sources** |
| 1 | 4-OEt (**2b**) | 5.19 | Not found | Estimated with Hammet constant [1]  (4-hexyloxyaniline calculated to 5.59[3]) |
| 2 | 4-Bu (**2c**) | 4.95 | Not found | Estimated with Hammet constant [1]  (4-Ethylaniline calculated to 5.0 [3]) |
| 3 | 3,4-methylene-dioxy (**2d**) | 4.46 | Not found | Estimated with Hammet constant [1] |
| 4 | 4-F (**2e**) | 4.65 | From Gross et al. [1] |  |
| 5 | H (**2a**) | 4.58 | From Gross et al. [1] |  |
| 6 | 3-OBn (**2f**) | ca 4.2 | Not found | Hammet constant not found, Approximated from 3-methoxyaniline (pKa 4.20[1]) |
| 7 | 3-ethyne (**2g**) | 3.82 | Not found | Estimated with Hammet constant [1] |
| 8 | 3-Cl (**2h**) | 3.34 | From Gross et al. [1] |  |
| 9 | 4-Br-3-F (**2i**) | 2.73 | Not found | Estimated with Hammet constant [1] |
| 10 | 4-NO2 (**2j**) | 1.02 | From Gross et al. [1] |  |
| 11 | N-Me-4-F (**2k**) | ca 4.9 | Not found | Approximated from *N*-methylamiline (pKa 4.89[4]) |
| 12 | 2-OH (2**l**) | 4.84 | From Tehan et al.[2] | Calculated: 4.52 [2] |
| 13 | 2,6-(i-Pr)2 (**2m**) | 4.4 | Not found | Calculated value.[3] |
| 14 | 2-I (**2n**) | 2.60 | From Tehan et al.[2] | Calculated: 3.11 [2] |
| 15 | 2,4-Cl (**2o**) | 2.0 | From Tehan et al.[2] | Calculated: 3.11 [2] |
| 16 | 2,4,5-Cl (**2p**) | 1.09 | From Tehan et al.[2] | Calculated: 2.02 [2] |
| 17 | 2,6-Cl (**2q**) | 0.42 | From Tehan et al.[2] | Calculated: 3.44 [2] |
| 18 | 2-NO2 (**2r**) | -0.31 | From Eastes et al.[4] |  |
| 19 | 2-CF3, 4-NO2 (**2s**) | < 0 | Not found | Estimated based on pKa of **2r** |
| 20 | 2,3,4,5,6-F (**2t**) | -0.28 | From Tehan et al.[2] | Calculated: -0.49 [2] |

# NMR spectra of new compounds

***N*-(4-Butylphenyl)-7*H*-pyrrolo[2,3-*d*]pyrimidin-4-amine (3c)**

**Figure S1.** 1H NMR (400 MHz, DMSO-*d6*) of compound **3c.**

**Figure S2.** 13C NMR (100 MHz, DMSO-*d6*) of compound **3c.**

***N*-(3-(Benzyloxy)phenyl)-7*H*-pyrrolo[2,3-*d*]pyrimidin-4-amine (3f)**

**Figure S3.** 1H NMR (400 MHz, DMSO-*d6*) of compound **3f.**

**Figure S4.** 13C NMR (100 MHz, DMSO-*d6*) of compound **3f.**

***N*-(3-Ethynylphenyl)-7*H*-pyrrolo[2,3-*d*]pyrimidin-4-amine (3g)**

**Figure S5.** 1H NMR (400 MHz, DMSO-*d6*) of compound **3g.**

**Figure S6.** 13C NMR (100 MHz, DMSO-*d6*) of compound **3g.**

***N*-(4-Bromo-3-fluorophenyl)-7*H*-pyrrolo[2,3-*d*]pyrimidin-4-amine (3i)**

**Figure S7.** 1H NMR (400 MHz, DMSO-*d6*) of compound **3i.**

**Figure S8.** 13C NMR (100 MHz, DMSO-*d6*) of compound **3i.**

***N*-(4-Fluorophenyl)-*N*-methyl-7*H*-pyrrolo[2,3-*d*]pyrimidin-4-amine (3k)**

**Figure S9.** 1H NMR (400 MHz, DMSO-*d6*) of compound **3k.**

**Figure S10.** 13C NMR (100 MHz, DMSO-*d6*) of compound **3k.**

***N*-(2-Iodophenyl)-7*H*-pyrrolo[2,3-*d*]pyrimidin-4-amin (3n)**

**Figure S11.** 1H NMR (600 MHz, DMSO-*d6*) of compound **3n.**

**Figure S12.** 13C NMR (150 MHz, DMSO-*d6*) of compound **3n.**

***N*-(2,4-Dichlorophenyl)-7*H*-pyrrolo[2,3-d]pyrimidin-4-amine (3o)**

**Figure S13.** 1H NMR (400 MHz, DMSO-*d6*) of compound **3o.**

**Figure S14.** 13C NMR (100 MHz, DMSO-*d6*) of compound **3o.**

**6-(4-Fluorophenyl)-N-phenyl-7H-pyrrolo[2,3-d]pyrimidin-4-amine (8)**

**Figure S15.** 1H NMR (600 MHz, DMSO-*d6*) of compound **8.**

**Figure S16.** 13C NMR (150 MHz, DMSO-*d6*) of compound **8.**

**6-(4-Bromophenyl)-N-phenyl-7H-pyrrolo[2,3-d]pyrimidin-4-amine (9)**

**Figure S17.** 1H NMR (600 MHz, DMSO-*d6*) of compound **8.**

**Figure S18.** 13C NMR (150 MHz, DMSO-*d6*) of compound **8.**

# References

[1] K.C. Gross, P.G. Seybold, Z. Peralta-Inga, J.S. Murray, P. Politzer, Comparison of Quantum Chemical Parameters and Hammett Constants in Correlating pKa Values of Substituted Anilines, J. Org. Chem., 2001, **66**, 6919-6925, <https://doi.org/10.1021/jo010234g>.

[2] B.G. Tehan, E.J. Lloyd, M.G. Wong, W.R. Pitt, E. Gancia, D.T. Manallack, Estimation of pKa Using Semiempirical Molecular Orbital Methods. Part 2: Application to Amines, Anilines and Various Nitrogen Containing Heterocyclic Compounds, Quant. Struct.-Act. Relat., 2002, **21**, 473-485, <https://doi.org/10.1002/1521-3838(200211)21:5><473::AID-QSAR473>3.0.CO;2-D.

[3] S.J. Broderius, M.D. Kahl, M.D. Hoglund, Use of joint toxic response to define the primary mode of toxic action for diverse industrial organic chemicals, Environ. Toxicol. Chemi., 1995, **14**, 1591-1605, <https://doi.org/10.1002/etc.5620140920>.

[4] J.W. Eastes, M.H. Aldridge, M.J. Kamlet, Effects of N-alkylation and N,N-dialkylation of the pKa of anilinium and nitroanilinium ions, J. Chem. Soc. (B), 1969, 922-928, <https://doi.org/10.1039/J29690000922>.
